# Supplementary material for: Palladium(0) catalyzed regioselective carbonyl propargylation across tetragonal tin(ii) oxide via redox transmetallationElectronic supplementary information (ESI) available: general method and experimental procedure and spectroscopic data for compounds 3–10. See http://www.rsc.org/suppdata/cc/b2/b211555g/
Source: Royal Society of Chemistry journal article supplement (doi:10.1039/b211555g), 2003-01-15
Supplement: b211555g.doc [file b211555g.doc]

Supplementary Material for Chemical Communications

This journal is © The Royal Society of Chemistry 2003

### Supplementary data

**Palladium(0) Catalyzed Regioselective Carbonyl Propargylation across Tetragonal Tin (II) Oxide via Redox Transmetallation**

## Moloy Banerjee & Sujit Roy*

## Organometallics & Catalysis Laboratory, Chemistry Department

Indian Institute of technology, Kharagpur 721302, India

#### CONTENT

General method & Experimental Procedure

Spectroscopic data for compounds **3-10**

**Experimental Section**

**General Comments:** 1H (200 MHz) NMR spectra were recorded on a BRUKER-AC 200 MHz. Spectrometer. Chemical shifts are reported in ppm from tetramethylsilane with the solvent resonance as the internal standard (deuterochloroform:  7.27 ppm). Data are reported as follows: chemical shifts, multiplicity (s = singlet, d = doublet, t = triplet, q = quartet, br = broad, m = multiplet), coupling constant (Hz). 13C (54.6 MHz) NMR spectra were recorded on a BRUKER-AC 200 MHz. Spectrometer with complete proton decoupling. Chemical shifts are reported in ppm from tetramethylsilane with the solvent resonance as the internal standard (deuterochloroform:  77.0 ppm). EIMS (70 ev) spectra and HRMS were taken using a VG Autospec M mass spectrometer. Elemental analysis were carried out by using an Elemental Analyzer VARIO EL instrument.

All reactions were carried out under an argon atmosphere in flamedried glassware using Schlenk techniques. Chromatographic purification were done with either 60-120 or 100-200 mesh silica gel (SRL). For reaction monitoring, precoated silica gel 60 F254 TLC sheets ( Merck) were used. Petroleum ether refers to the fraction boiling in the range 60-800 C. Tetrahydrofuran was distilled prior to use. Pd2(dba)3 (In *Synthetic Methods of Organometallic and Inorganic Chemistry*, Herrman, W. A.; Salzer, A.; Thieme: New York, 1996, Vol. 1, p 160.) and -SnO (In *Handbook of Preparative Inorganic Chemistry*; Brauer, G, Eds.; Academic Press: London, 1963; Volume 1, Part II, pp 736-737) were prepared according to reported procedures. The cubic form (SnO-A) could be prepared in very good yield in the pH range 9-9.5. Propargyl bromides were prepared by the reaction of the corresponding propargyl alcohols with phosphorus tribromide and pyridine in ether.

**Typical Procedure for the propargylation of aldehydes**:

A mixture of 4-chlorobenzaldehyde (140 mg, 1 mM) and 3-bromo-prop-1-yne (178 mg, 2 mM) in THF (2.5 ml) was slowly added to a stirred solution containing -SnO (202 mg, 1.5 mM) and Pd2(dba)3 (9.1mg, 0.01 mM) in THF(2 ml) and H2O (0.5 ml) which was previously refluxed for 30 mins. The suspension was refluxed at 700C under N2 atmosphere for 12 h (TLC monitoring on Silica gel, eluent: ethyl acetate/hexane 1/9 v/v ).

An aqueous solution of NH4F (15%,10 ml) was added to the reaction mixture and the organic layer was extracted with diethyl ether (3x10 ml), washed with water (2x10 ml), brine (2x10 ml), and dried over magnesium sulfate. Solvent removal followed by column chromatography (eluent n-hexane-ethyl acetate 97:3) afforded pure 1-(4-Chloro-phenyl)-but-3-yn-1-ol (94 mg, 52% w.r.t. aldehyde).

**SPECTROSCOPIC AND ANALYTICAL DATA OF PRODUCTS**

**1-(4-Chloro-phenyl)-2,2-dimethyl-3-butyn-1-ol (3) :** 1H NMR:  1.09 (s, 3H, C*H*3), 1.24 (s, 3H, C*H*3), 2.21 (s, 1H, C*H*3), 2.37 (brs, 1H, CHO*H*), 4.45 (s, 1H, C*H*OH), 7.31 (s, 4H, Ph); 13C NMR: 143.23, 133.68, 128.96, 127.73, 88.89, 79.36, 71.04, 37.61, 25.84, 24.32; EIMS *m/z* (rel abundance): 208 (1), 166 (2), 141 (100), 113 (21), 77 (75), 68 (75), 51 (15), 39 (9); HRMS calculated for C12H13OCl (*m/z*) 208.0655 found (*m/z*) 208.0648; Anal (C12H13OCl) calcd, C:69.07, H:6.28; found, C:69.81, H:6.13.

**1-(4-Chloro-phenyl)-2-ethyl-2-methyl-3-butyn-1-ol (4) :** (mixture of 2 diastereomers) 1H NMR:  0.96-1.70 (m, 8H, C(C*H3*)C*H2*C*H3*), 2.22 (s, 1H, C*H*), 2.31 (brs, 1H, CHO*H*), 4.53 (s, 1H, C*H*OH), 7.30-7.42 (m, 4H, Ph); 13C NMR: 138.54 138.17 133.59 129.08 128.85 128.29 127.76 127.68 87.57 87.5 78.66 78.44 72.34 42.46 42.11 30.74 29.31 22.04 20.67 9.01 8.96; EIMS *m/z* (rel abundance): 222 (1), 207 (1), 180 (1.5), 141 (100), 113 (21), 82 (69), 77 (76), 67 (91), 51(15), 41(10); HRMS calculated for C13H15OCl (*m/z*) 222.0811 found (*m/z*) 222.0802; Anal (C13H15OCl) calcd, C:70.11, H:6.79; found, C:70.23, H:6.58.

**1-(4-Formyl-phenyl)-2-ethyl-2-methyl-3-butyn-1-ol (5) :** (mixture of 2 diastereomers) 1H NMR:  0.95-1.73 (m, 8H, C(C*H3*)C*H2*C*H3*), 2.26-2.27 (s, 1H, C*H*), 2.70 (brs, 1H, CHO*H*), 4.58, 4.61(s, 1H, C*H*OH), 7.51-7.80 (m, 4H, Ph), 9.94 (s, 1H, C*H*O); 13C NMR: 191.60, 147.28, 146.80, 135.90, 128.84, 128.49, 127.09, 87.89, 87.33, 78.89, 78.69, 72.69, 42.48, 42.08, 30.58, 29.66, 21.80, 21.00, 9.03; HRMS calculated for C14H16O2 (*m/z*) 216.2783 found (*m/z*) 216.2775; Anal (C14H16O2) calcd, C:77.75, H:7.46; found, C:77.61, H:7.57.

**1-(4-Methyl-phenyl)-2-ethyl-2-methyl-3-butyn-1-ol (6) :** (mixture of 2 diastereomers) 1H NMR:  0.95-1.76 (m, 8H, C(C*H3*)C*H2*C*H3*), 2.25 (s, 1H, C*H*), 2.28 (s, 3H, PhC*H*3), 2.35 (brs, 1H, CHO*H*), 7.12-7.79 (m, 4H, Ph); 13C NMR: 137.47, 137.18, 136.85, 130.47, 128.96, 128.39, 128.36, 127.72, 88.17, 87.99, 79.55, 79.08, 71.36, 42.54, 42.28, 31.08, 29.31, 22.52, 21.00, 20.74, 9.08, 9.01; HRMS calculated for C14H18O (*m/z*) 202.2948 found (*m/z*) 202.2959; Anal (C14H18O) calcd, C:83.13, H:8.97; found, C:83.37, H:8.56.

**1-(2-Furyl)-2,2-dimethyl-3-butyn-1-ol (7) :** 1H NMR:  1.21 (s, 3H, C*H*3), 1.36 (s, 3H, C*H*3), 1.95 (s, 1H, C*H*), 2.21 (brs, 1H, CHO*H*), 4.48 (s, 1H, C*H*OH), 6.33-6.37 (m, 2H, ), 7.39-7.42 (m, 1H); 13C NMR: 153.76, 141.54, 110.07, 107.50, 88.59, 74.47, 70.46, 37.45, 26.21, 24.43; HRMS calculated for C10H12O2 (*m/z*) 164.2037 found (*m/z*) 164.2048; Anal (C10H12O2) calcd, C:73.15, H:7.37; found, C:73.04, H:7.43.

**1-(4-Chloro-phenyl)-but-3-yn-1-ol (8) :** 1H NMR:  2.07 (t, 1H, J= 2.6 Hz, C*H*), 2.41 (brs, 1H, CHO*H*), 2.61 (dd, 2H, J= 4.47 Hz,1.82 Hz, C*H*2), 4.85 (t, 1H, J= 6.32 Hz, C*H*OH), 7.33 (s, 4H, Ph); 13C NMR: 140.86, 133.68, 128.61, 127.16, 80.17, 71.62, 71.32, 29.45; EIMS *m/z* (rel abundance): 180 (1), 162 (1), 141 (100), 113 (15), 77 (73), 51 (10), 39 (7); HRMS calculated for C10H9OCl (*m/z*) 180.0342 found (*m/z*) 180.0349; Anal (C10H9OCl) calcd, C:66.50, H:5.02; found, C:66.71, H:5.15.

**1-Phenyl-1-hexen-5-yn-3-ol (9) :** 1H NMR:  2.04 (t, 1H, J= 2.58 Hz, C*H*), 2.56 (m, 2H, C*H*2), 6.25 (dd, 1H, J= 4.9 Hz,11.01 Hz, =C*H*-), 6.65 (d, 1H, J= 15.9 Hz, -C*H*=); 13C NMR: 136.35, 131.31, 130.00, 128.53, 127.81, 126.58, 80.15, 71.18, 70.63, 27.82; EIMS *m/z* (rel abundance): 172 (9), 133 (100), 115 (44), 103 (22), 91 (17), 77 (28), 55 (47), 51 (11), 39 (9); HRMS calculated for C12H12O (*m/z*) 172.0888 found (*m/z*) 172.0900; Anal (C12H12O) calcd, C:83.69, H:7.02; found, C:83.67, H:7.22.

**1-(4-Cyano-phenyl)-but-3-yn-1-ol (10) :** 1H NMR:  2.08 (t, 1H, J= 2.48 Hz, C*H*), 2.17 (s, 1H, CHO*H*), 2.46-2.81 (m, 2H, C*H2*), 4.35 (t, 1H, J= 6.92 Hz, C*H*OH), 7.45-7.79 (m, 4H, Ph); 13C NMR: 147.51, 132.25, 130.60, 127.77, 126.53, 79.49, 71.89, 71.47, 29.70, 29.50 ; HRMS calculated for C11H9NO (*m/z*) 171.1971 found (*m/z*) 171.1960; Anal (C11H9NO) calcd, C:77.18, H:5.30; found, C:77.23, H:5.17.
